# Supplementary material
Source: PubMed Central journal article supplement (PMC10461337)
Supplement: NIHPP2023.08.03.551873V2-supplment-1.pdf [file NIHPP2023.08.03.551873V2-supplment-1.pdf]

## Supplemental information

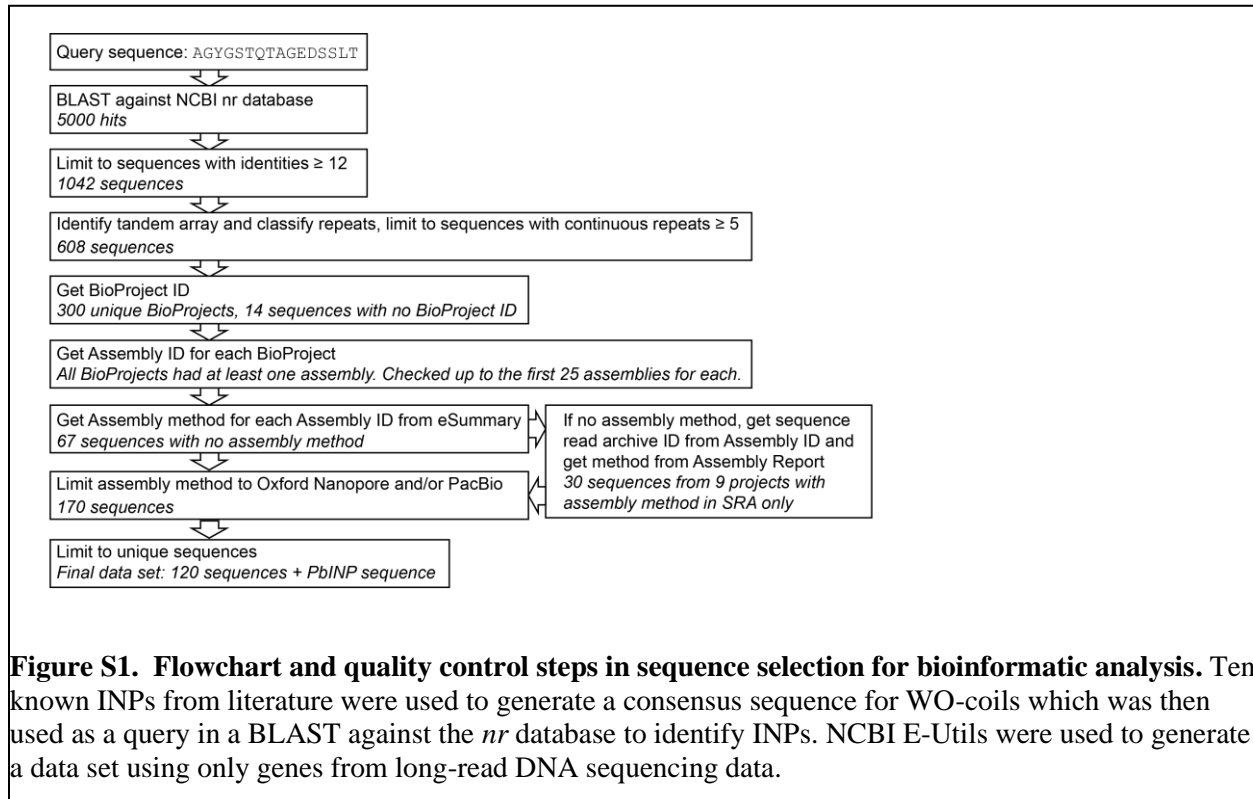

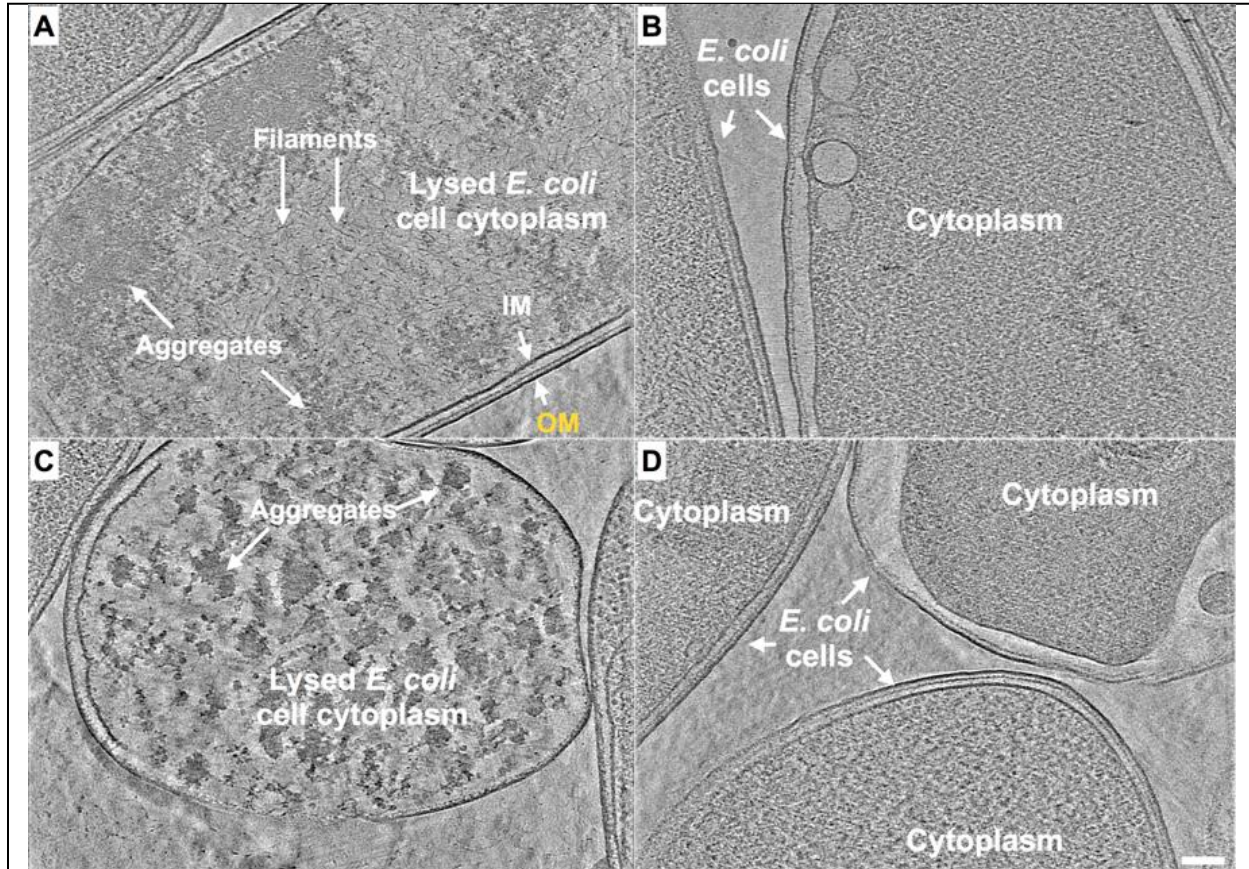

**Figure S5.** *E. coli* expressing INP mutant lacking R-coils shows no fibre clusters as observed in those cells overexpressing WT INP. **A-D)** Representative snapshots from 3-D cryo-tomograms showing cytoplasmic and extracellular features of various *E. coli* cells overexpressing an INP mutant in which all but the C-terminal R-coil have been replaced by WO-coils. All four images are in the same scale and the scale bar represents 100 nm.
